# Supplementary material for: A carcinogenic trigger to study the function of tumor suppressor genes in Schmidtea mediterranea
Source: PubMed Central journal article supplement (PMC6176991; doi:10.1242/dmm.032573), 2018-08-16
Supplement: dmm-11-032573-s1.pdf [file dmm-11-032573-s1.pdf]

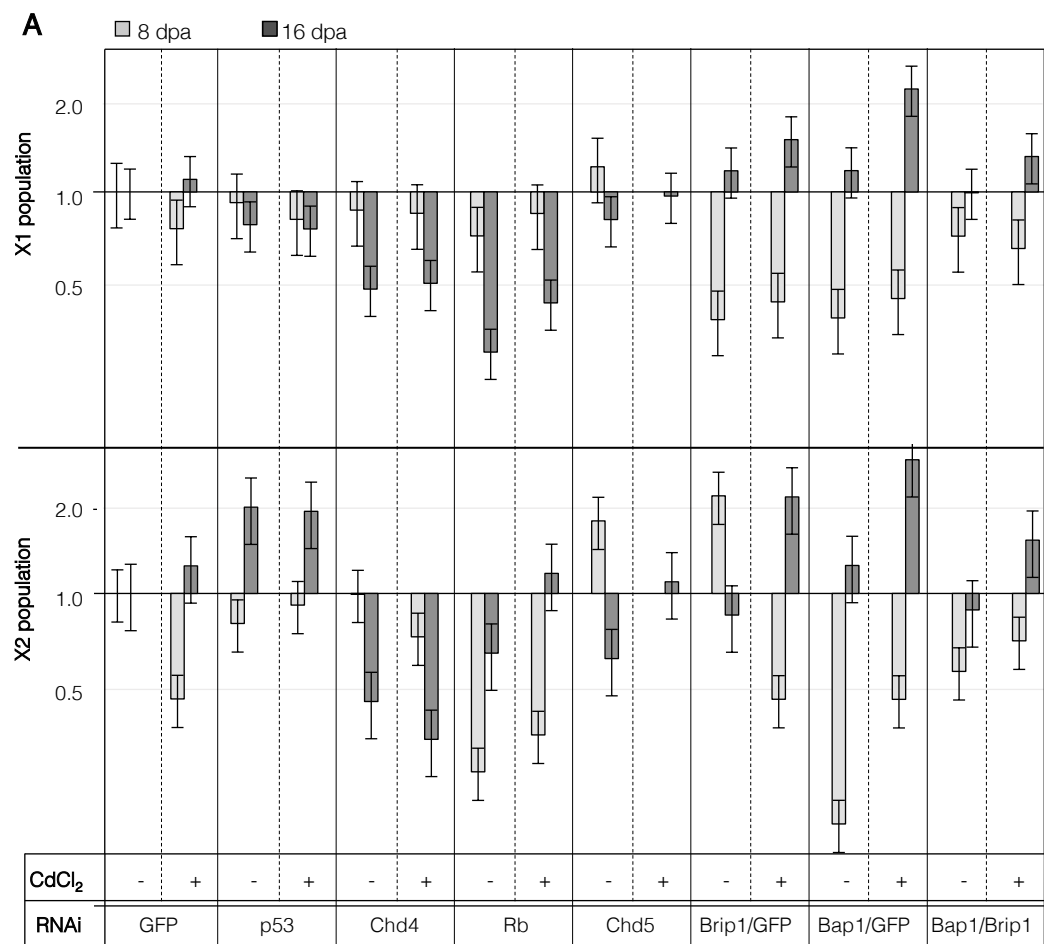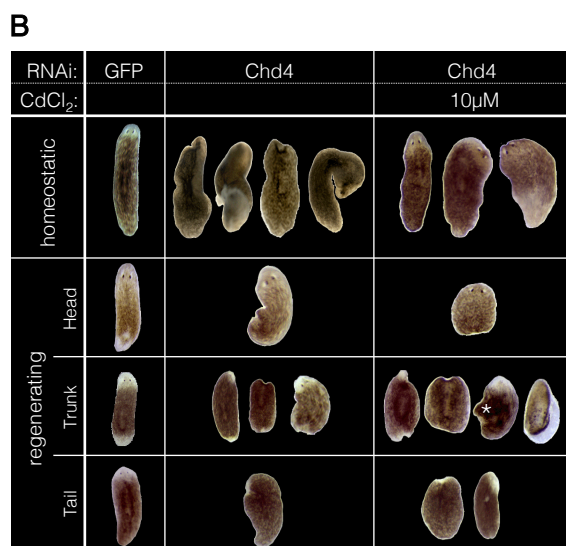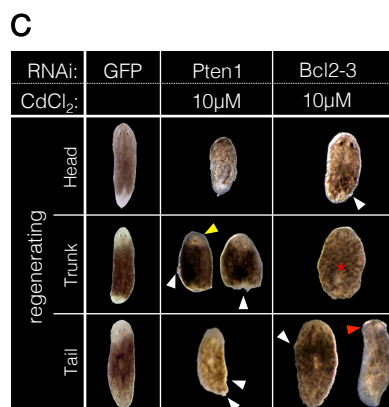

**Supplemental figure 1. Phenotypes associated to TSGs is exacerbated by Cd.** Changes in the stem cell populations (X1 and X2) associated with TSG KD, in presence (Cd-) or absence (Cd+) of Cd (A). The onset of Chd4(RNAi) phenotype is accelerated by Cd (B). Homeostatic animals imaged at 18 (Cd-) or 15 (Cd+) dpi; regenerating animals imaged at 15 (Cd-) or 11 (Cd+) dpa. Outgrowths marked with a white asterisk. Formation of small epidermal blisters (white arrowheads) and regeneration defects (cyclopia, yellow arrowhead) in Smed-Pten1(RNAi) (Cd+) fragments, at 12 dpa (C). Bloating (red asterisk), epidermal blisters (white arrowheads) and regeneration defects (lack of photoreceptor; red arrowhead) are visible in Smed-Bcl2-3(RNAi) (Cd+) animals between 11 and 14 dpa (C).

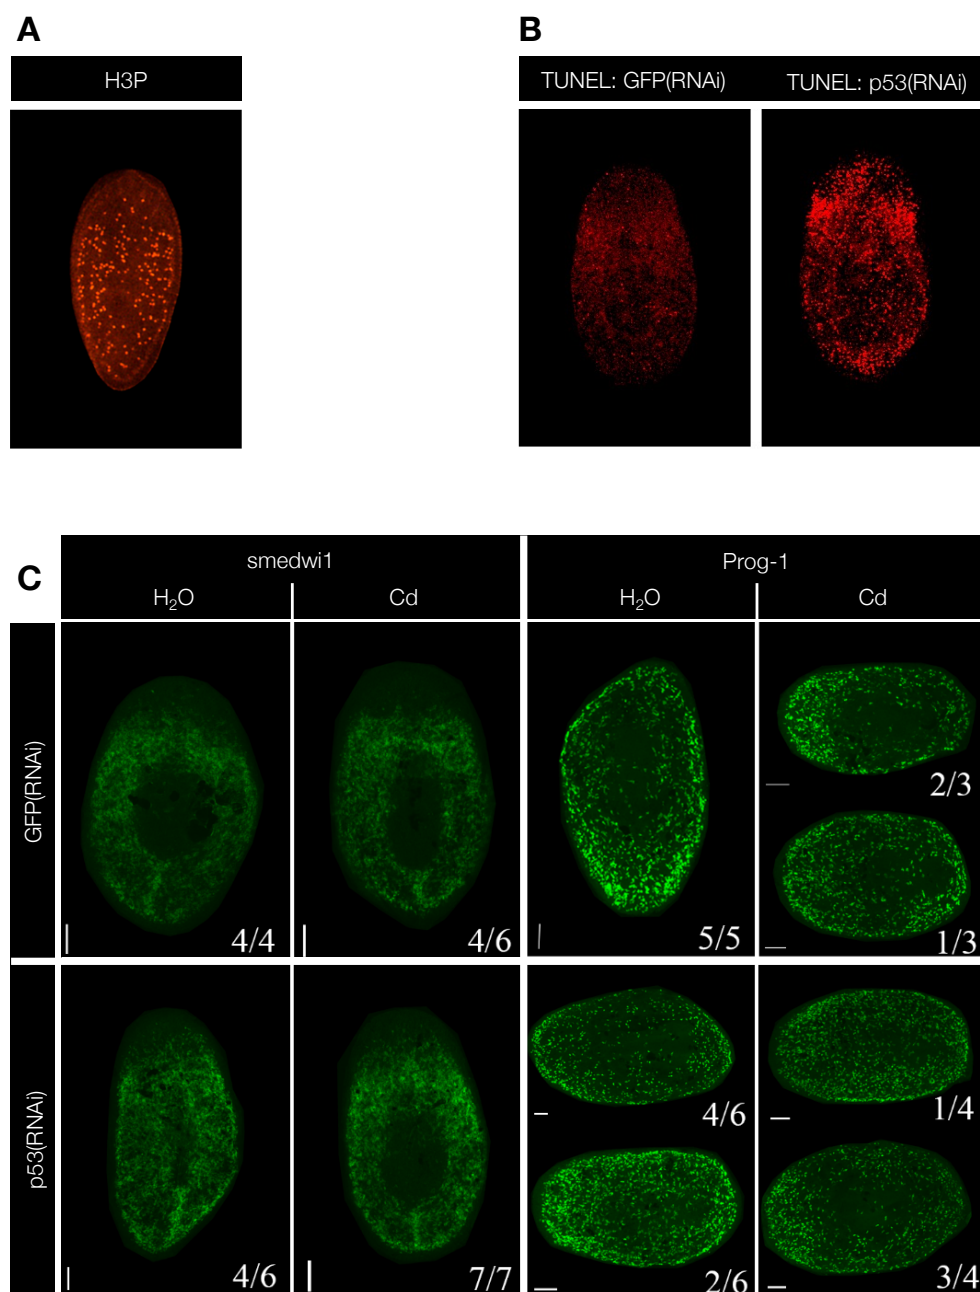

**Supplemental Figure 2. Proliferation, apoptosis, stem cells and progeny in p53(RNAi) animals.** Representative H3P immunostaining (**A**). Representative images of TUNEL in GFP(RNAi) (left) and p53(RNAi) (right), both exposed to Cd (**B**). Distribution of stem and progeny cells (**C**). smedwi1<sup>+</sup> (**C**, left panels) and Prog-1<sup>+</sup> (**C**, right panels) cells in GFP(RNAi) or p53(RNAi) animals at 11 dpa, in absence or presence of 10  $\mu$ M CdCl<sub>2</sub>. One confocal slice is shown for smedwi1; The maximum projection of all confocal slices are shown for Prog-1. Scale bars in **C**: 100  $\mu$ M. Number of biological replicates is indicated in **C**.

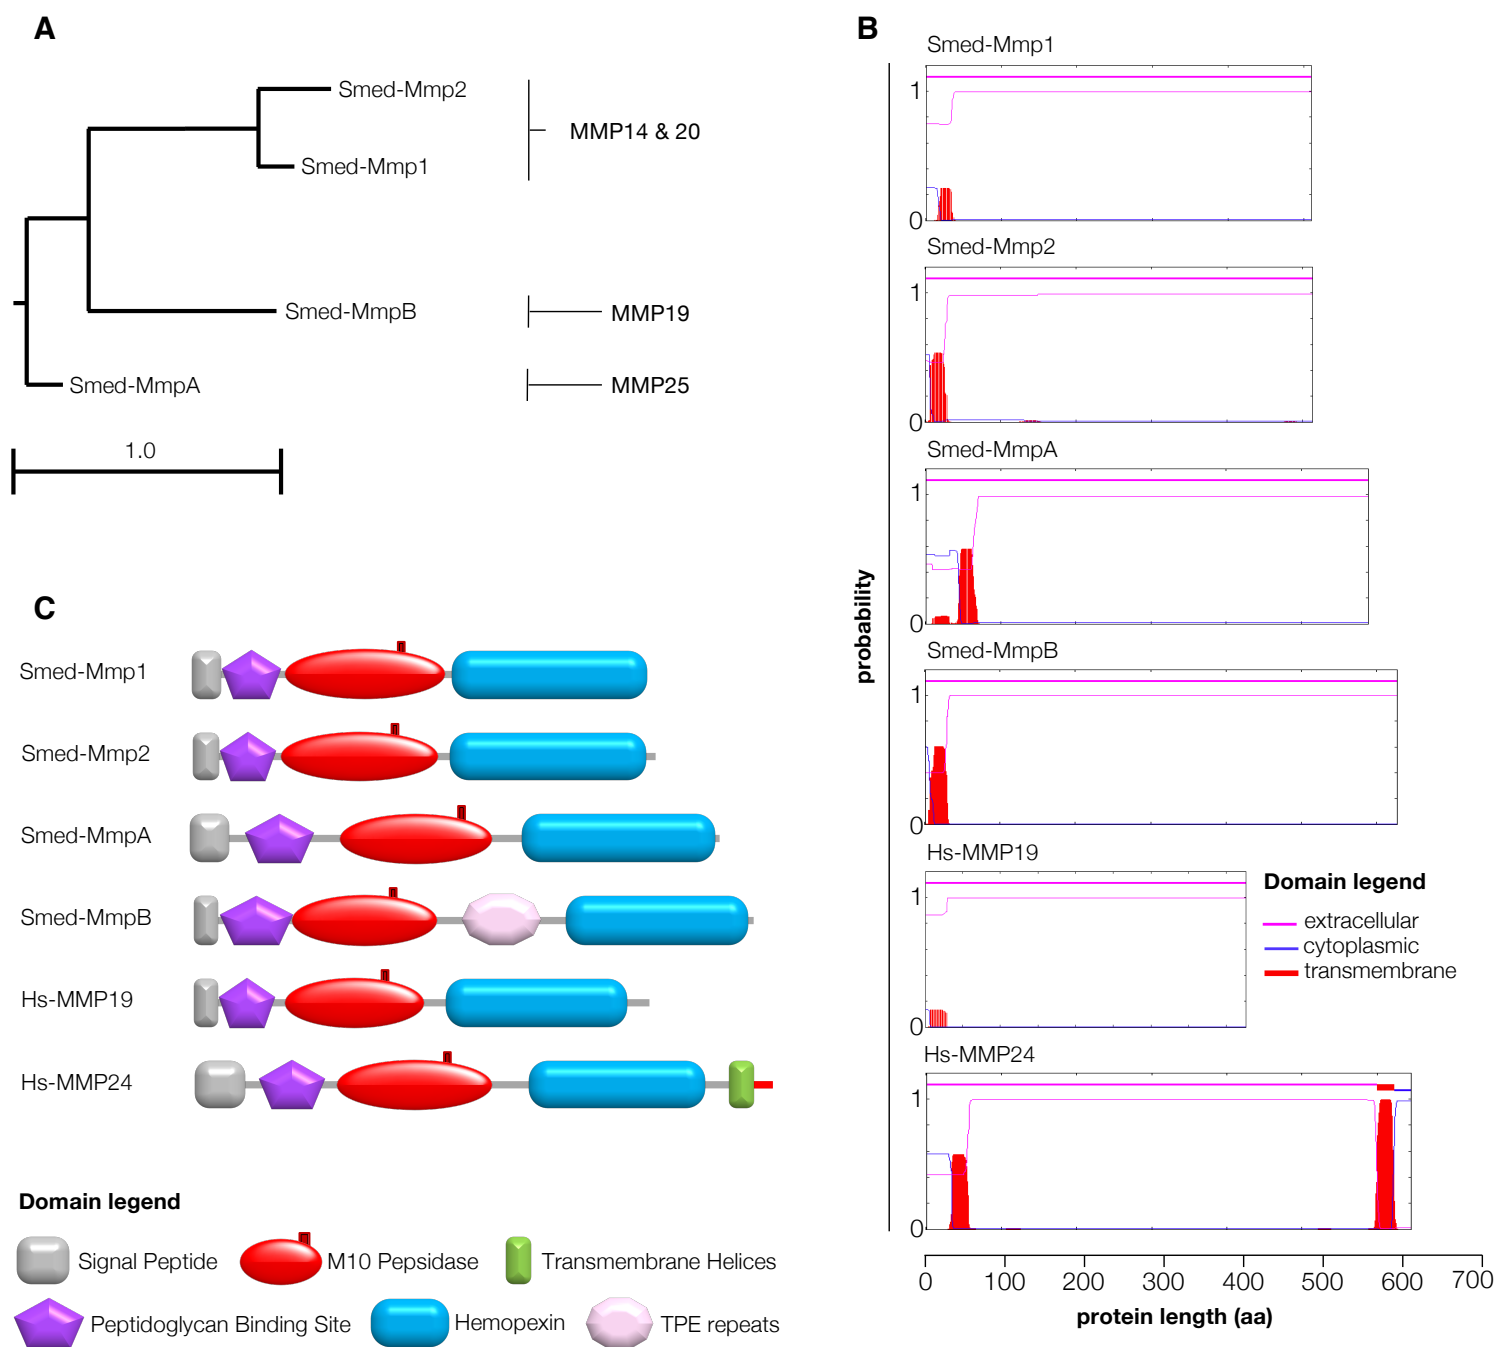

**Supplemental figure 3. *In silico* predicted features of *S. mediterranea* MMP proteins.** Genetic relationship of known planarian MMPs as depicted by Clustal Omega, and their homology with mammalian MMPs (A). Cytoplasmic, transmembrane and extracellular domains of planarian MMPs as predicted by TMHMM (<http://www.cbs.dtu.dk/services/TMHMM/>) compared with 2 human proteins, MMP19 (secreted) and MMP24 (membrane-bound) (B). Only Hs\_MMP24 was predicted to have transmembrane and cytoplasmic domains. Protein domains of planarian MMPs, human MMP19 and human MMP24 as defined by InterProScan (<https://www.ebi.ac.uk/interpro/>) (C). Except for a stretch of TPE repeats, Smed-MMPB has the classical features of a secreted MMP: signal peptide in the N-terminus (SP), peptidoglycan binding domain (PGB), the proteolytic M10 domain and the hemopexin-like domain at the C-terminus. To be noticed the transmembrane helices at the C-terminus of the membrane-bound human MMP24.

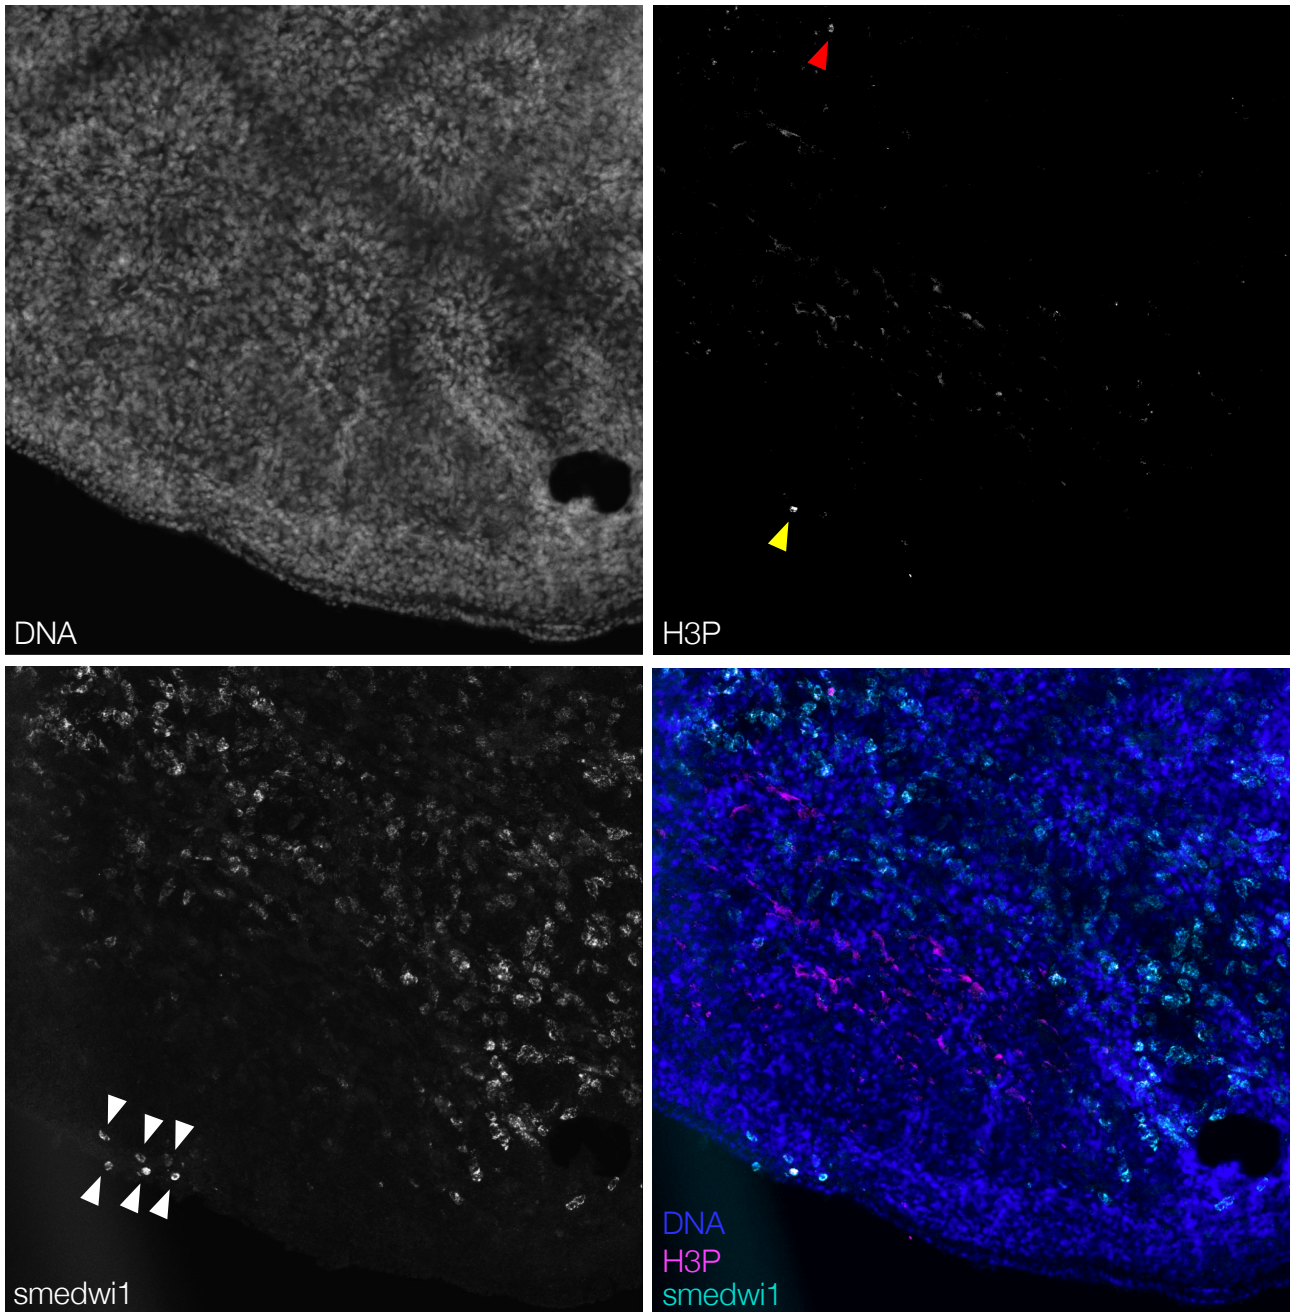

**Supplemental figure 4. Confocal stack depicting a small epidermal blister in a Smed-MmpB(RNAi) animal.** The blister was found at the lateral edge of the animal, posterior to the brain. It consisted of 6 smedwi1<sup>+</sup> cells (white arrowheads), one of which was also H3P<sup>+</sup> (yellow arrowhead). Within the depicted field, one additional H3P<sup>+</sup> cell showed up in the body of the animal (red arrowhead).

Supplemental Table 1. Phenotypic changes after RNAi of the in silico defined TSGs in *S. mediterranea*.

| Gene  | Molecular function                   | Mutation - associated phenotype in human          | Planarian ortholog expression                             | RNAi phenotype (homeostasis & regeneration)                                                                                                                                                                                                                                                                                         |                                                                                                                                                                                                                                                                                                                                                                                                                                                                                                    | Notes                                  |
|-------|--------------------------------------|---------------------------------------------------|-----------------------------------------------------------|-------------------------------------------------------------------------------------------------------------------------------------------------------------------------------------------------------------------------------------------------------------------------------------------------------------------------------------|----------------------------------------------------------------------------------------------------------------------------------------------------------------------------------------------------------------------------------------------------------------------------------------------------------------------------------------------------------------------------------------------------------------------------------------------------------------------------------------------------|----------------------------------------|
|       |                                      |                                                   |                                                           | 0 $\mu$ M Cd                                                                                                                                                                                                                                                                                                                        | 10 $\mu$ M Cd                                                                                                                                                                                                                                                                                                                                                                                                                                                                                      |                                        |
| p53   | Transcription factor                 | Brain, breast cancer; leukemia                    | Stem and progeny cells (Pearson & Sánchez-Alvarado, 2010) | <b>Homeostasis:</b> head regression, thinning of pre-pharyngeal region (34/36, <b>94.4%</b> ).<br><b>Regeneration:</b> abnormal blastema formation, impaired regeneration, especially of the head (H: 7/9 ( <b>77.8%</b> ), Tr: 5/9 ( <b>55.5%</b> ), Ta = 5/9 ( <b>55.5%</b> )).                                                   | <b>General:</b> faster onset of the phenotype, higher lethality.<br><b>Homeostasis:</b> ventral curling, head regression, thinning of pre-pharyngeal region, outgrowth formation (35/36, <b>97.2%</b> ).<br><b>Regeneration:</b> abnormal blastema formation, impaired regeneration, outgrowth formation (H: 8/13, <b>61.5%</b> ; Tr: 8/13, <b>61.5%</b> ; Ta = 7/13, <b>53.8%</b> ); increase of the X2 gate (188% @ 8 dpa, 183% @ 16 dpa).                                                       |                                        |
| Rb    | Transcriptional regulator            | Retinoblastoma, osteosarcoma                      | Stem cells, post-mitotic cells (Zhu & Pearson, 2013)      | <b>Homeostasis:</b> symmetrical lateral constrictions, head regression (34/36, <b>94.4%</b> ).<br><b>Regeneration:</b> poor regeneration of all fragments (H: 14/21 ( <b>67%</b> ), Tr: 19/21 ( <b>90.5%</b> ), Ta = 21/21 ( <b>100%</b> ); reduction of X1 (20% @ 11 dpa, 31% @ 16 dpa) and X2 (28% @ 11 dpa, 69% @ 16 dpa) gates. | <b>General:</b> stronger phenotype.<br><b>Homeostasis:</b> ventral curling, abnormalities of the pharynx and tail lesions (35/36, <b>97.2%</b> ).<br><b>Regeneration:</b> abnormal blastema formation, little or no regeneration (H: 20/22, <b>91%</b> , Tr: 21/22, <b>95.5%</b> ; Ta = 22/22, <b>100%</b> ), outgrowth formation (H: 1/22, <b>4.7%</b> ; Tr: 2/22, <b>9.4%</b> ); reduction of X1 (27% @ 11 dpa, 45% @ 16 dpa) and X2 (19% @ 11 dpa) gates. At 16 dpa, X2 gate increases to 116%. |                                        |
| Pten1 | Transcriptional regulator            | Breast, thyroid, head and neck cancer; glioma     | Progeny cells (Oviedo et al., 2008)                       | <b>Regeneration:</b> regeneration impaired; pigmented dots; death (4/6, <b>66.7%</b> ).                                                                                                                                                                                                                                             | <b>General:</b> faster onset of the phenotype<br><b>Regeneration:</b> regeneration impaired; pigmented dots (3/12, <b>25%</b> ); blisters (4/12, <b>33%</b> ), bloating (1/12, <b>8.3%</b> ), and death (5/12, <b>41.6%</b> ).                                                                                                                                                                                                                                                                     |                                        |
| Chd4  | Helicase (transcriptional repressor) | Hyper-methylation in nasopharyngeal carcinoma     | Stem and progeny cells (Scimone et al., 2010)             | <b>Homeostasis:</b> asymmetrical lateral dents, head regression (34/36, <b>94.4%</b> ).<br><b>Regeneration:</b> regeneration impaired (50/54, <b>92.5%</b> ); reduction of X1 (49% @ 16 dpa) and X2 (45% @ 16 dpa) gates.                                                                                                           | <b>General:</b> faster onset of the phenotype.<br><b>Homeostasis:</b> asymmetrical lateral dents, head regression (34/36, <b>94.4%</b> ).<br><b>Regeneration:</b> regeneration impaired (53/54, <b>98.1%</b> ), outgrowth formation (H: 1/18, <b>5.5%</b> ); X1 (85% @ 11 dpa, 50% @ 16 dpa) and X2 (72% @ 8 dpa, 34% @ 16 dpa) gates were further reduced.                                                                                                                                        |                                        |
| Chd5  | Helicase (transcriptional repressor) | Epithelial, neural and hematopoietic malignancies | Stem cells, post-mitotic cells                            | <b>Regeneration:</b> increase of both X1 and X2 gates, limited to the early phase (8-10 dpa: X1 120%; X2 170%), then reduction of both gates (15-17 dpa: X1 81%; X2 61%).                                                                                                                                                           | N/A                                                                                                                                                                                                                                                                                                                                                                                                                                                                                                |                                        |
| Wt1   | Transcription factor                 | Kidney, ovarian cancer; leukemia                  | Post-mitotic cells                                        | N/A                                                                                                                                                                                                                                                                                                                                 | N/A                                                                                                                                                                                                                                                                                                                                                                                                                                                                                                |                                        |
| Bap1  | Transcriptional repressor            | Breast, lung, skin, kidney cancer; metastasis     | Post-mitotic cells                                        | <b>Regeneration:</b> reduction of both X1 and X2 gates, limited to the early phase (8-10 dpa: X1 40%; X2 18%).                                                                                                                                                                                                                      | <b>Regeneration:</b> reduction of both X1 and X2 gates, limited to the early phase (8-10 dpa: X1 40%; X2 46%), then increase of both gates (15-17 dpa: X1 210%; X2 267%)                                                                                                                                                                                                                                                                                                                           | No phenotype in Brip1/Bap1 double RNAi |



| Gene   | Molecular function                        | Mutation - associated phenotype in human             | Planarian ortholog expression                                  | RNAi phenotype (homeostasis & regeneration)                                                                                    |                                                                                                                                                                                                            | Notes                                  |
|--------|-------------------------------------------|------------------------------------------------------|----------------------------------------------------------------|--------------------------------------------------------------------------------------------------------------------------------|------------------------------------------------------------------------------------------------------------------------------------------------------------------------------------------------------------|----------------------------------------|
|        |                                           |                                                      |                                                                | 0 $\mu$ M Cd                                                                                                                   | 10 $\mu$ M Cd                                                                                                                                                                                              |                                        |
| Brip1  | dsDNA repair                              | Breast, ovarian, germline cancer                     | Stem cells, post-mitotic cells                                 | <b>Regeneration:</b> reduction of X1 gate and increase of the X2 gate, limited to the early phase (8-10 dpa: X1 39%, X2 205%). | <b>Regeneration:</b> reduction of both X1 and X2 gates, limited to the early phase (8-10 dpa: X1 45%, X2 205%); late increase of both X1 and X2 populations (15-17 dpa: X1 146%, X2 203%)                  | No phenotype in Brip1/Bap1 double RNAi |
| Bcl2-3 | Pro-apoptotic regulator                   | Colorectal cancer, Leukemia                          | N/A                                                            | <b>Regeneration:</b> 1 head fragment died (1/9, 11.1%)                                                                         | <b>Regeneration:</b> regeneration impairment (7/9, 77.8%), epidermal blisters (1/9, 11.1%), bloating (2/9, 22.2%), outgrowth formation (1/9, 11.1%) and death (5/9, 55.5%); impaired movement (7/9, 77.8%) | Pigmentation change (pigment clusters) |
| Msh2   | DNA mismatch repair                       | Colorectal cancer                                    | Stem cells (Hollenbach et al., 2010)                           | N/A                                                                                                                            | N/A                                                                                                                                                                                                        |                                        |
| Mlh1   | DNA mismatch repair                       | Stomach, head and neck, colorectal, lung cancer      | Stem cells                                                     | N/A                                                                                                                            | N/A                                                                                                                                                                                                        |                                        |
| Wwox   | protein-protein interaction               | Head and neck, uterus, stomach cancer                | Post-mitotic cells                                             | N/A                                                                                                                            | N/A                                                                                                                                                                                                        |                                        |
| Pdcd4  | Cell cycle and transcriptional regulator  | Lung, liver, colorectal, breast cancer; glioblastoma | Post-mitotic cells                                             | N/A                                                                                                                            | N/A                                                                                                                                                                                                        |                                        |
| Max    | Transcriptional regulator                 | Lung cancer                                          | Stem cells, post-mitotic cells                                 | N/A                                                                                                                            | N/A                                                                                                                                                                                                        |                                        |
| Apc    | Signaling                                 | Colorectal cancer                                    | Post-mitotic cells                                             | N/A                                                                                                                            | N/A                                                                                                                                                                                                        |                                        |
| Smg1   | Kinase (NMD)                              | Leukemia                                             | Stem cells, post-mitotic cells (Gonzalez-Estevéz et al., 2012) | N/A                                                                                                                            | N/A                                                                                                                                                                                                        |                                        |
| Mta1   | Transcriptional coregulator               | EMT, invasion, metastasis                            | Stem cells                                                     | N/A                                                                                                                            | N/A                                                                                                                                                                                                        |                                        |
| Lrh1   | Nuclear receptor and transcription factor | Pancreatic cancer; cell proliferation                | Post-mitotic cells                                             | N/A                                                                                                                            | N/A                                                                                                                                                                                                        |                                        |

Supplemental Table 2. qRT-PCR oligonucleotides used in this study.

| <b>Gene Name</b> | <b>Sequence 5' → 3'</b>                                                                                       |
|------------------|---------------------------------------------------------------------------------------------------------------|
| Smed-Gapdh       | P. forward GAGTTGGAATCAATGGCTTCG<br>Probe CGCGCAACACCAATCGTCCAATTC<br>P. reverse TCAACTGTGCCTTTCTCCAG         |
| Smed-piwi-1      | P. forward AGTTCCTGTTCCAACGCATTATG<br>Probe CTGAACTCGTTGGCAAGA<br>P. reverse CTGGAGGAGTAACACCACGATGA          |
| Smed-pcna        | P. forward GTGATGGTTTTGAGACTTATCGATG<br>Probe TGTTAGGGAATCATTACTACCAAGCGCC<br>P. reverse GTTTCACCTGAATCAGCGGC |
| Smed-inx13       | P. forward TTCTGTTTCTCAGGTTCGATTTCT<br>Probe TCAAACAATCGGCAAACAACGCTCG<br>P. reverse CCATGAACGTTGGCGATTTG     |
| Smed-smad6/7     | P. forward GCCACAGTGAGTCAGGTTTA<br>Probe ACCAGTCATGCCATCTATCACGAC<br>P. reverse CACCAGCGATTTCCAGTTTG          |
| Smed-soxP-1      | P. forward TCAACACCACTAAGCACCTATC<br>Probe CACACGTAAGCTGAGAACGCCTGA<br>P. reverse CAGCTGCAATTTGGCCTATG        |
| Smed-soxP-2      | P. forward GACTTTAACCATGAGCCGATTG<br>Probe CAACCGATTCCAGTTCAACGATTGCC<br>P. reverse CCCGTTCCATCTATCAGAACT     |
| Smed-egr-1       | P. forward TCGGACAATTCGAACAGGTA<br>Probe CGGGTGGCAGTTGATTGGATTTGC<br>P. reverse CGATCAGTACAATTTGAGAGAGG       |
| Smed-fgfr-1      | P. forward CTCCAGACGCTAGTTCCATTATAG<br>Probe CGATGGCGACCGATTTGTTGCAT<br>P. reverse GGACAAGACATGCTGTTTGATG     |
| Smed-soxP-3      | P. forward GAAGCTGCTTGGCCTCATT<br>Probe CGGAGTCCGTTCTTCAGCTGACATT<br>P. reverse GGCTAGCCAATATCCGAATTTCT       |
| Smed-zfp-1       | P. forward TCCCGTGCCTGAACAATTT<br>Probe TGTCACATTTGCAACACCAGCTTCAC<br>P. reverse CGCATGCCTCTGTAGATTTGA        |
| Smed-p53         | P. forward ATCGTCGAGCCTGTTTCATC<br>Probe TCCGACGACATGCCAACATTGTCT<br>P. reverse ATCAAATTCTCCGTTGGGAATAAAG     |
| Smed-gata4/5/6   | P. forward GTGAACTGTGGAGCTAGCAATA<br>Probe TTGTGGTCCCGGGATAATTCTGGC<br>P. reverse AGAGAACCCTGTCGCATTTCATC     |

|              |                                                                                                                |
|--------------|----------------------------------------------------------------------------------------------------------------|
| Smed-hnf-4   | P. forward TTTGGAAGCGACTTGGTATAGG<br>Probe TGTCGTTGATCCGTCGCTTCTTGT<br>P. reverse CTAATCCACCCAGCTCTTTCTG       |
| Smed-nkx2.2  | P. forward CCGATTTCAAACAGTTCCACTTAC<br>Probe TGCCAGCAGACTCAAACATCCAGT<br>P. reverse CAGTGATCCGTACGCTGAATTA     |
| Smed-prox-1  | P. forward GATAAAGTCAGCCGGAATAGCA<br>Probe ACGTCCTCAATGTGCTGTAAAGTGCA<br>P. reverse CGCCTTCTTGATTTAGCAAAGAC    |
| Smed-agat-1  | P. forward GGTTGGAAGATTGTGAAGGG<br>Probe TGTATGAAGGCATGAGTTACAAGTGGC<br>P. reverse CCAACCTCTCGCTTTTCA          |
| Smed-NB32.1g | P. forward GGCACTCATTCTCGTTTCTGTATT<br>Probe TGTCGAGTCGCATTTTAAATCGGCG<br>P. reverse GTTCTCGCTGTGTTATTTGTTACGT |
| Smed-msh-2   | P. forward GTGCCTTTGCGACTCATTTTC<br>Probe ACACGTGACTGCACAGACAATTGGA<br>P. reverse GGCCCTTCTCGACTTTTATAC        |
| Smed-mta-1   | P. forward TCCGTGACAGCCCATTATATC<br>Probe TCCGACAAGCTGTTCAACTCCACA<br>P. reverse CAACAAGTTCCATAGAGTCCAATAAC    |
| Smed-mlh1    | P. forward ATTAGCGAGTGTTACCCATGTAG<br>Probe CTGTTGAAACCACCCAAACCGTGT<br>P. reverse TCGAACGATTGTTCCGGTATT       |
| Smed-Rb      | P. forward GCAGTTTGCGACTGAGAGATA<br>Probe CGATCGATTGCACATCAGCCGAGA<br>P. reverse CATCGGTCCTTGAGAAGATGAG        |
| Smed-smg-1   | P. forward CCTCCTGGTTCATGGACTAATG<br>Probe TGTTTGCTCGGTTGAAGCACAGTG<br>P. reverse GTTGCTGGAAATCGCCAATC         |
| Smed-brip-1  | P. forward CCCGTCAAACATCAGAAATGAAT<br>Probe AGATGGCGCATTATTGCTAGCGGT<br>P. reverse CTACACCTTCACTGGCCTTAC       |
| Smed-Chd5    | P. forward TTGAGAACGCGTTGCTTATTG<br>Probe TGGGAGCTGCATGTGACGGATATT<br>P. reverse GGGACGGATTGATGTGGATAG         |
| Smed-pten-1  | P. forward CGTTTGTGCTTGTGTTGCTATCT<br>Probe ATCCGCCACGGACATTCTCCAATT<br>P. reverse TTGTCACTCCTTTCCCGTTC        |
| Smed-pdcd-4  | P. forward AGCGCCAGAAATAGTTGGTAAA<br>Probe AGCCGTAGCCGACGATTTATTAGCC<br>P. reverse GCTAAAGCGCGGAGTTGATA        |



|            |                                                                                                           |
|------------|-----------------------------------------------------------------------------------------------------------|
| Smed-wt-1  | P. forward CGATGAGCTGTCTCGACATAAA<br>Probe AGTTCAATCGGAGCGATCATTGTCCA<br>P. reverse TGAATGATTCTTGTGGGTCTT |
| Smed-wwox  | P. forward GAATGGAGGTCTGAGCGTAAT<br>Probe AGTGCCGTAAAGCCTTGCAAATGC<br>P. reverse CGCTATCGGTCTGAAAGTTAGT   |
| Smed-bap-1 | P. forward CGAGGATTAGCACTGGGAAAT<br>Probe CAGAATTGGCGGATGCACACAACA<br>P. reverse GCGGCAACACTGTGATATAAAC   |
| Smed-Apc   | P. forward GGAAGGGACACCGAATAGTTT<br>Probe TCGTTTCAGAGCAGATGGAATCACGC<br>P. reverse AGCACCTGGTGGTTTAGAATAG |
